1  
2  
3  
4  
5  
6  
7  
8  
9  
10  
11  
12  
13  
14  
15  
16  
17  
18  
19  
20  
21  
22  
23  
24  
25  
26  
27  
28  
29  
30  
31

## **Metazoan-like kinetochore arrangement masked by the interphase RabI configuration**

Authors:

Alberto Jiménez-Martín<sup>¶</sup>, Alberto Pineda-Santaella<sup>¶</sup>, Daniel León-Periñán, David Delgado-Gestoso, Laura Marín-Toral and Alfonso Fernández-Álvarez\*

Andalusian Center for Developmental Biology (CABD) (Pablo de Olavide University/Consejo Superior de Investigaciones Científicas/Junta de Andalucía). Ctra. Utrera km. 1, 41013 Seville (Spain)

<sup>¶</sup> Co-first authors

\*Correspondence: [aferalv@upo.es](mailto:aferalv@upo.es)

ORCID: 0000-0001-7628-1273 (Alberto Jiménez-Martín); 0000-0003-1156-8104 (Alberto Pineda-Sataella); 0000-0002-7970-0362 (Daniel León-Periñán); 0000-0003-2202-4946 (David Delgado-Gestoso); 0000-0002-4871-290X (Laura Marín-Toral); 0000-0002-7455-1425 (Alfonso Fernández-Álvarez)

32

33

34

35

36

37 **Abstract**

38

39 During cell cycle progression in metazoan, the kinetochore, the protein complex  
40 attached to centromeres which directly interacts with the spindle microtubules, the  
41 vehicle of chromosome segregation, is assembled at mitotic onset and disassembled  
42 during mitotic exit. This program is assumed to be absent in budding and fission yeast  
43 because kinetochore proteins are stably maintained at the centromeres throughout the  
44 entire cell cycle. In this work, we show that the assembly program at the mitotic onset  
45 of the Ndc80 complex, a crucial part of the outer kinetochore, is unexpectedly  
46 conserved in *Schizosaccharomyces pombe*. We have identified this behavior by  
47 removing the Rab1 chromosome configuration during interphase, in which  
48 centromeres are permanently associated with the nuclear envelope beneath the spindle  
49 pole body. Hence, the Rab1 configuration masks the presence of a program to recruit  
50 Ndc80 at mitotic onset in fission yeast, similar to that taking place in metazoan.  
51 Besides the evolutionary implications of our observations, we think that our work will  
52 help understand the molecular processes behind the kinetochore assembly program  
53 during mitotic entry using fission yeast as the model organism.

54

55

56

57

58

59

60

61

62

63

64

65

66

67 **Introduction**

68         The three-dimensional configuration of the genome in yeast is characterized  
69 by the evolutionarily conserved Rab1 chromosome configuration, defined by the  
70 stable association of centromeres and telomeres to the nuclear envelope (NE) (Jin et  
71 al. 1998; Jin, Fuchs, and Loidl 2000; Taddei and Gasser 2012). The NE comprises the  
72 inner nuclear membrane (INM) and the outer nuclear membrane (ONM), wherein the  
73 INM proteins play key roles in the interaction of the NE with chromatin (Czapiewski,  
74 Robson, and Schirmer 2016; Fernandez-Alvarez and Cooper 2017a). In particular, in  
75 fission yeast, centromeres are clustered together at the INM beneath the spindle pole  
76 body (SPB, the centrosome equivalent in yeast) and opposite to the nucleolus  
77 (Funabiki et al. 1993; Jin et al. 1998; Jin, Fuchs, and Loidl 2000), in a kinetochore-  
78 dependent manner. The linkage between centromeres and the INM occurs via the  
79 SPB-associated LINC complex (the linker of nucleoskeleton and cytoskeleton), which  
80 comprises the KASH-domain ONM proteins (Kms1 and Kms2) and the SUN-domain  
81 INM protein Sad1 (Hagan and Yanagida 1995; Hiraoka and Dernburg 2009; Unruh,  
82 Slaughter, and Jaspersen 2018; Shimanuki et al. 1997), which plays an essential role  
83 in supporting the kinetochore-SPB association. Besides, this connection is  
84 strengthened by the protein Csi1, which bridges Sad1 and outer kinetochore proteins,  
85 together with the conserved HEH/LEM domain INM protein, Lem2, which localizes  
86 at the nuclear periphery and the SPB (Hou et al. 2012; Barrales et al. 2016;  
87 Fernandez-Alvarez and Cooper 2017a). It is thought that the Rab1 configuration  
88 reflects the positioning of the chromosomes during their segregation from the  
89 preceding mitosis which, in metazoan, is dismantled at the mitotic exit, but, in yeast,  
90 it is maintained throughout the subsequent interphase (Therizols et al. 2010). The  
91 reasons why the Rab1 chromosome configuration in yeast is not disassembled at the  
92 mitotic exit and is maintained throughout interphase have been a mystery during  
93 decades. Recently, it has been observed in fission yeast that the interaction of at least  
94 one centromere with the SPB during interphase is a prerequisite to trigger the SPB  
95 insertion into the NE, a crucial event to nucleate the spindle microtubules. Hence, the  
96 destruction of the Rab1 chromosomal organization abolishes SPB insertion and  
97 spindle formation and, consequently, leads to cellular lethality (Fernandez-Alvarez et  
98 al. 2016).

99            Attachment of centromeres to the SPB and, thus, the maintenance of the Rab1  
100 configuration, is supported by the kinetochore, the protein complex built on them  
101 (Cheeseman 2014). This large protein complex comprises around 80 members  
102 identified in humans, and its major components are conserved throughout eukaryotes.  
103 It can be subdivided into two distinct regions: the inner kinetochore, which forms the  
104 interphase with chromatin, and the outer kinetochore that constitutes the platform for  
105 interacting with spindle microtubules. Therefore, the kinetochore establishes the  
106 chromosomal attachment place for spindle microtubules, the motor that drives  
107 chromosomes distribution into daughter cells (Cheeseman and Desai 2008).

108            Importantly, kinetochore composition is dynamically regulated during the cell  
109 cycle in metazoan (Hara and Fukagawa 2018). There are kinetochore proteins that are  
110 constitutively present at centromeres (centromere-associated network, CCAN), but  
111 most of them are recruited to the kinetochore during late G2, prophase, or mitosis; this  
112 manner, members of the outer kinetochore complexes, for instance, Mis12 and  
113 Ndc80, are precisely recruited to the centromeres in late interphase and during  
114 prophase, respectively; consistently, once chromosomes are segregated, Ndc80 and  
115 Mis12 are orderly depleted following the onset of anaphase or the end of mitosis,  
116 respectively (Cheeseman and Desai 2008; Dhatchinamoorthy, Mattingly, and Gerton  
117 2018; Nagpal and Fukagawa 2016). This well-regulated kinetochore components  
118 recruitment to the centromeres is assumed to be absent in *S. pombe*, where most of the  
119 outer kinetochore components such as Ndc80 and Nuf2, are constitutively present at  
120 centromeric regions throughout the cell cycle (Biggins 2013; Wigge and Kilmartin  
121 2001) and only the components of the DASH complex, an essential element of the  
122 kinetochore that is required for the bi-orientation of sister chromatids, are recruited  
123 during mitosis (Liu et al. 2005; Cheeseman et al. 2001; Janke et al. 2002).

124            Two hypotheses try to explain the absence of the outer kinetochore  
125 recruitment program at mitotic onset in fission yeast: firstly, the absence of the  
126 nuclear envelope breakdown (NEBD) (Gu, Yam, and Oliferenko 2012); it has been  
127 observed that outer kinetochore disassembly/assembly program is a mechanism  
128 coordinated with the NEBD in metazoan (Hattersley et al. 2016); thus, the fact that  
129 NE is not disassembled before mitosis in *S. pombe* suggests that it might not be an  
130 efficient mechanism of outer kinetochore formation which it would involve an active  
131 transit of proteins from the cytoplasm to the nucleus. Secondly, the preservation of the  
132 outer kinetochore structure during interphase might be justified by its crucial role of



133 maintaining the Rab1 configuration (Asakawa et al. 2005; Takahashi, Chen, and  
134 Yanagida 2000); thus, in this case, the absence of an assembly program in fission  
135 yeast mitosis would be, in principle, independent of the absence of a proper NEBD.

136 It is challenging to discern whether the absence of the NEBD or the outer  
137 kinetochore role in the Rab1 configuration is the reason behind the absence of the  
138 outer kinetochore disassembly/assembly cycle in fission yeast. This problem would be  
139 enlightened by studying the behavior of the kinetochore in cells without the interphase  
140 Rab1 chromosome configuration. However, the idea of generating Rab1-deficient cells  
141 without compromising neither kinetochore structure nor cell viability has been  
142 challenging to address during the last decades. For instance, mutations on Nuf2 or  
143 Ndc80 partially remove Rab1 configuration but also alter kinetochore structure  
144 (Asakawa et al. 2005; Hsu and Toda 2011; Nabetani et al. 2001); on the other hand,  
145 the presence of a thermosensitive allele of *sad1* (*sad1.2*) at restrictive growth  
146 temperature (36°C) abolishes all centromere-SPB associations but immediately leads  
147 to cell death (Fernandez-Alvarez et al. 2016). Hence, the development of a new  
148 system where the intact kinetochore was completely disconnected from the SPB at  
149 32°C (standard temperature of growing for fission yeast) without dramatically  
150 impairing cell viability would help further disclose the behavior of kinetochore  
151 proteins in the absence of the Rab1 nuclear configuration during yeast interphase.  
152 With the stated purpose, we here identified that the combination of the *sad1.2* allele  
153 together with the deletion of *csi1* at the semi-permissive temperature of 32°C  
154 generates severe centromere dissociation defects. In contrast, most of the cells are still  
155 viable due to occasional centromere interaction with the SPB, which is sufficient to  
156 trigger spindle formation. This manner, *sad1.2 csi1Δ* is a new scenario in which it is  
157 possible to characterize the behavior of the kinetochores dissociated from the SPB  
158 independently of its essential function of maintaining the Rab1 chromosome  
159 configuration.

160 In this paper, we found that the dissociation of the centromeres from the SPB  
161 induces outer kinetochore disassembly during interphase and, more unexpectedly, we  
162 showed that, similar to metazoan, the outer kinetochore is reassembled in late G2.  
163 These results suggest that the outer kinetochore assembly program at mitotic onset  
164 coordinated with cell cycle progression is conserved in fission yeast, so far not  
165 observed because of being masked by the Rab1 configuration. Our observations place  
166 *S. pombe* as a model organism to study the mechanisms behind the kinetochore

167 assembly program highly conserved in metazoan and with enormous relevance for  
168 faithful chromosome segregation during cell cycle progression.

169

170

## 171 **Results and Discussion**

### 172 **Levels of Ndc80 and Nuf2 at the centromeres remain constant throughout** 173 **mitotic interphase.**

174 To accurately address the kinetochore proteins behavior at centromeres during  
175 the cell cycle progression in fission yeast, we first followed the focal intensity of  
176 endogenously GFP-tagged proteins on exponentially growing wild-type cells by live  
177 fluorescence microscopy, which also allowed to discard possible signal fluctuations.  
178 We analyzed Mis6 and Cnp20 (CENP-T ortholog) as representative members of the  
179 inner kinetochore (Hou et al. 2012; Takahashi, Chen, and Yanagida 2000) and Mis12,  
180 another outer component of the NMS complex (Obuse et al. 2004), which is also  
181 assembled and disassembled at mitotic onset and exit, respectively, during the  
182 metazoan cell cycle, but constantly attached to centromeres in yeast (Biggins 2013).  
183 Besides, we also studied the levels of Ndc80-GFP and Nuf2-GFP (Ndc80 complex) as  
184 part of the outer kinetochore, that localize at centromeres during interphase in  
185 budding and fission yeast (Biggins 2013; Liu et al. 2005). All images were processed  
186 at these experiments, and the protein intensity levels were quantified (see Methods  
187 section). Using this approach, we delineated the focal intensity of all these  
188 kinetochore proteins normalized per SPB signal (visualized via Sid4-mCherry)  
189 (Figure 1). As expected, our results indicated that all kinetochores components appear  
190 in a conspicuous focus in interphase at the SPB due to the stable centromere-SPB  
191 associations. Spindle formation (visualized by ectopically expressed mCherry-Atb2,  
192 tubulin) occurred for all analyzed kinetochore proteins during mitosis (Figure 1).  
193 Moreover, the focus intensity of all studied kinetochore proteins showed stable  
194 presence without significant signal fluctuation throughout interphase (Figure 1); in  
195 particular, Ndc80 and Nuf2, the two outer kinetochore canonical proteins, which  
196 modified their recruitment throughout the metazoan cell cycle, stably colocalized with  
197 the SPB signal during the experiment (Figure 1D and 1E). Our results discarded  
198 significant microvariations in all analyzed kinetochore protein signals, showing their  
199 recruitment to centromeres and maintaining their interactions with SPB along the  
200 whole cell cycle, which confirm the existence of a differential behavior between the

201 fission yeast and metazoans outer kinetochore proteins. The prominent role of Ndc80  
202 and Nuf2 supporting the Rab1 chromosome configuration might be behind this fact.  
203 Thus, to explore this hypothesis, our efforts focused on removing the Rab1 nuclear  
204 organization, neither compromising cell viability nor altering the stability of the  
205 kinetochore complex to evaluate the recruitment program of kinetochore proteins in  
206 the absence of their SPB associations at normal growth conditions.

207

208 **Neither nuclear microtubules nor actin plays an essential role in maintaining the**  
209 **Rab1 configuration in fission yeast.**

210 We explored different approaches to remove the interphase kinetochore-SPB  
211 associations at 32°C without altering the stability of both protein complexes. In  
212 budding yeast, centromere association to the NE requires nuclear microtubules  
213 (Bystricky et al. 2004; Jin, Fuchs, and Loidl 2000). For this reason, we first explored  
214 the possible role of microtubules in maintaining the Rab1 configuration in fission  
215 yeast. To study the role of microtubules on centromere association to the SPB, we  
216 added the microtubule-depolymerizing drug carbendazim (MBC) to exponentially  
217 growing *wt* cells harboring Sid4-mCherry and mCherry-Atb2 as SPB and tubulin  
218 markers, respectively. Centromeres were visualized by endogenously GFP-tagged of  
219 the inner kinetochore protein Mis6. These experiments showed that the addition of  
220 MBC at concentrations able to completely eliminate microtubule formation did not  
221 induce any obvious centromere clustering defects (Figure 2A). To strengthen this  
222 observation, we quantified the distance between SPB and centromeres in growing  
223 cells with and without the addition of MBC, measuring the distance between Sid4-  
224 mCherry and Mis6-GFP foci (see Methods section) (Figure 2C-2E). Using this  
225 approach, we did not find any significant difference between both conditions,  
226 suggesting that, in contrast to *S. cerevisiae*, the maintenance of the Rab1 chromosome  
227 configuration in *S. pombe* might not depend on nuclear microtubules polymerization  
228 (Jin, Fuchs, and Loidl 2000).

229 Similarly, we next wondered about the possible role of actin in maintaining  
230 the Rab1 configuration, given its role as a motor that promotes the telomere  
231 positioning at the NE during budding yeast meiotic prophase (Trelles-Sticken et al.  
232 2005). To explore the role of actin in kinetochore-SPB associations in fission yeast,  
233 we disrupted actin with the addition of Latrunculin A (Lat A), an actin polymerization  
234 inhibitor, to exponentially growing cells. As control of actin disruption, we used an *S.*

235 *pombe* strain harboring a GFP-tagged version of Lifeact (LA-GFP), a peptide that  
236 labels F-actin *in vivo* (Riedl et al. 2008; Huang et al. 2012). After 10 min of treatment,  
237 we observed major actin structural defects visualized by LA-GFP in wild-type-treated  
238 cells compared to untreated (Figure 2B). However, under these conditions, we noticed  
239 that centromere-SPB associations persist at the same level than in a *wt* untreated  
240 setting (Figure 2C-2E). Hence, we discard a major role of actin in the Rab1  
241 configuration maintenance, discarding the possibility of using this approach to  
242 develop a Rab1 configuration-deficient scenario.

243 To sum up, our results showed that the centromere-SPB interactions, and  
244 consequently, the Rab1 chromosome configuration, seem to be independent of  
245 microtubules differing from the situation found in budding yeast, also independent of  
246 actin. This suggests that the Rab1 nuclear organization in *Saccharomyces cerevisiae*  
247 might be more dynamic than in *Schizosaccharomyces pombe*, which seems to be  
248 rather more fixed. In fact, in contrast to fission yeast, it has been observed that  
249 efficient DNA damage repair promotion needs centromeres disconnection from the  
250 SPB in budding yeast, which depends on microtubule dynamics (Strecker et al. 2016).

251

### 252 **Phosphomutant and phosphomimetic versions of Sad1 residues Thr-3 and Ser-52** 253 **do not lead to centromere dissociation defects.**

254 An independent approach to address the complete disruption of the Rab1  
255 configuration in *S. pombe* is to use the thermo-sensitive Sad1 allele, *sad1.2*, with  
256 which all centromeres dissociate from the SPB when *sad1.2* cells are growth at 36°C.  
257 However, this scenario leads to total cell lethality due to a failure in the SPB insertion  
258 into the NE and spindle formation (Fernandez-Alvarez et al. 2016). Conversely, the  
259 growth of this strain at semi-permissive temperature (32°C) produces only partial  
260 centromere-SPB defects and does not completely disrupt the Rab1 configuration  
261 (Fernandez-Alvarez and Cooper 2017b) (Figure 2F). Hence, we tried to generate more  
262 penetrant versions of the *sad1.2* allele to promote a greater centromere-SPB  
263 disassociation phenotype. The Sad1.2 protein version harbors two single Thr-3-Ser  
264 and Ser-52-Pro substitutions, being Ser-52 a validated phosphorylation site for the  
265 cyclin-dependent protein kinase Cdc2/CDK-1 (Fernandez-Alvarez et al. 2016; Carpy  
266 et al. 2014; Swaffer et al. 2016). We generated phosphomutant and phosphomimetic  
267 alleles for Thr-3 and Ser-52 residues in cells harboring Sid4-mCherry and mCherry-  
268 Atb2 as SPB and tubulin markers, respectively. We could not find centromere-SPB

269 clustering defects in any of the mutants studied except for the previously  
270 characterized Sad1.2 (T3S S52P) (Fernandez-Alvarez et al. 2016)(Figure 2G). This  
271 analysis also showed that only the combination of T3S S52P leads to centromere  
272 declustering from SPB since all the other combinations produce a *wt*-like phenotype,  
273 with almost no defects at all. Congruently, analysis of cellular growth on MBC-  
274 containing media showed higher hypersensitivity for *sad1.2* cells compared to the  
275 other *sad1* mutant allele combinations (Figure 2H). Previous studies have shown that  
276 MBC hypersensitivity in mutants showing some degree of centromere-SPB  
277 dissociation is associated with problems in spindle recapture of chromosomes during  
278 mitosis; the fact that centromeres were located far from the SPB could complicate  
279 their capture by microtubules during mitosis, showing a high sensitivity to MBC-  
280 induced microtubule loss (Hou et al. 2012). Our observations argue against the  
281 possibility that the association of centromeres to SPB was regulated only by  
282 phosphorylation of Sad1 residues Thr-3 and Ser-52. Therefore, the ability to control  
283 the centromere association with Sad1 must be controlled by other complementary  
284 mechanisms that are probably altered by the Thr-3-Ser and Ser-52-Pro substitutions.  
285 Current studies aim to decipher the basis for these centromere-SPB associations.

286

287 **Loss of Csi1 in *sad1.2* cells leads to a higher rate of total centromere-SPB**  
288 **dissociations.**

289 The foregoing observations indicate that the Rab1 chromosome configuration  
290 in *S. pombe* seems to be less dynamic than in budding yeast, since microtubule  
291 depolymerization has no impact on the centromere-SPB interactions. Since the  
292 analysis of the *sad1* alleles suggested the role of alternative proteins, we sought to  
293 induce the total transient centromere declustering by eliminating the stabilizer of the  
294 centromere-Sad1 associations, Csi1, together with the LEM-domain INM protein  
295 Lem2 (Hou et al. 2012; Barrales et al. 2016)(see Figure 2F). With this aim, we  
296 constructed strains combining deletions of all the three genes that encoded for Sad1,  
297 Csi1, and Lem2 proteins. The double deletion of *csi1* and *lem2* on a *sad1.2* setting  
298 leads, in most cases, to spores unable to germinate, indicating a defective cell growth  
299 of the triple mutant (Figure 3A). Sporadically, *sad1.2 lem2 $\Delta$  csi1 $\Delta$*  cells managed to  
300 grow, probably associated with the compensatory increased *lnp1* gene expression, as  
301 previously observed (Tange et al. 2016). Due to these severe viability defects, we  
302 discarded to work with the triple mutant. Analysis of the behavior of all possible

303 double mutant combinations showed that double loss of Csi1 and Lem2 severely  
304 impact on cell viability. These defects have been associated with defective  
305 pericentromeric heterochromatin identity, which impairs kinetochore proteins  
306 association to centromeres, leading to chromosome loss and subsequent growing  
307 defects on MBC-containing media, as previously has been reported (Barrales et al.  
308 2016; Hou et al. 2012) (Figure 3B and 3C). The other combination showing a major  
309 defect on cellular growth was the double mutant *sad1.2 csi1Δ* (Figure 3B); these cells  
310 also showed increased sensitivity to MBC (Figure 3C). Thus, these experiments  
311 pointed out the double mutants *sad1.2 csi1Δ* and *lem2Δ csi1Δ* as possible scenarios  
312 with greater centromere-SPB dissociation. It has been reported that 10-15% of *lem2Δ*  
313 *csi1Δ* cells show all centromeres transiently disconnected from the SPB (Barrales et  
314 al. 2016; Fernandez-Alvarez and Cooper 2017b), but no information has been  
315 obtained yet about the double mutant *sad1.2 csi1Δ*. For this reason, we investigated  
316 the state of the centromere-SPB contacts in *sad1.2 csi1Δ* cells using live fluorescence  
317 microscopy. For a comparative purpose, we included all the strains generated and  
318 allocated centromere dissociation phenotypes into two categories: i) *Partial*  
319 *centromere-SPB dissociation*, when, at least, one centromere is detached from the  
320 SPB during the analysis (example in -40' frame in Figure 3E, quantitation in Figure  
321 3G); and ii) *Total centromere-SPB dissociation* when all three centromeres are  
322 dissociated from the SPB. In this last category, we established two subtypes:  
323 *transient*, at least one frame in interphase during our time-lapse analysis showed total  
324 centromere-SPB dissociation (example in -30' frame in Figure 3E, quantitation in  
325 Figure 3H); or *persistent*, similar to the previous one, but centromeres did not interact  
326 with the SPB at all at any time during the analysis at interphase (Figure 3F,  
327 quantification in Figure 3I). In the case of *transient total centromere dissociation*,  
328 cells are still able to divide since one centromere-SPB interaction is sufficient to  
329 trigger the SPB insertion into the NE, which allows spindle formation (Fernandez-  
330 Alvarez et al. 2016). In contrast, in the *persistent* category, the SPB insertion and,  
331 consequently, spindle formation is abolished (Fernandez-Alvarez et al. 2016) (Figure  
332 3F and quantitation in Figure 3I). We assigned the phenotypes of *sad1.2*, *csi1Δ*,  
333 *lem2Δ*, and the double mutant combinations to these categories. Noteworthy, we  
334 found more severe defects in *sad1.2 csi1Δ* cells: around 80% of *sad1.2 csi1Δ* cells  
335 showed centromere clustering defects, and most importantly, ~25% of this mutant  
336 cells showed *transient total centromere dissociation* being this category never seen in



337 the single *csi1Δ*, *lem2Δ* or *sad1.2* single mutants. On the other hand, ~9% of *sad1.2*  
338 *csi1Δ* cells displayed *persistent total centromere dissociation* reduction in cellular  
339 viability (Figures 3B and 3I). Interestingly, although cell growth defects and MBC  
340 sensitivity of the *lem2Δ csi1Δ* strain are more severe in comparison with the *sad1.2*  
341 *csi1Δ* genotype (Figures 3B and 3C), the rate and strength of centromere-SPB  
342 dissociation of the *lem2Δ csi1Δ* mutant is significantly lower, which suggests that part  
343 of the growth defects might be independent of the loss of centromere-SPB contacts;  
344 previous works that demonstrated the role of Lem2 in the maintenance of the  
345 heterochromatin and nuclear envelope might justify these differences (Kume et al.  
346 2019; Barrales et al. 2016; Tange et al. 2016). In conclusion, we identified *sad1.2*  
347 *csi1Δ* as an optimal scenario where exploring the behavior of the kinetochore in Rab1  
348 chromosome configuration-deficient cells for the combination of two reasons: 1) its  
349 higher and severe defects in total centromere-SPB dissociation and 2) its lower impact  
350 on cell viability compared to the *sad1.2*, *csi1Δ*, and *lem2Δ* setting.

351

### 352 **Ndc80 and Nuf2 dislocate from centromeres during interphase in Rab1 deficient** 353 **cells.**

354 To further elucidate the behavior of the kinetochore when it is not associated  
355 with the SPB during interphase, we analyzed inner and outer kinetochore proteins at  
356 the centromeres in cells with and without the Rab1 chromosome conformation. We  
357 tested Cnp20 and Mis6 as canonical inner kinetochore proteins and Ndc80 and Nuf2  
358 as outer kinetochore proteins. With this aim, we constructed *sad1.2 csi1Δ* strains  
359 harboring endogenously GFP-tagged Cnp20, Ndc80, and Nuf2 together with the  
360 previously analyzed Mis6. Consistently with our previous observations with Mis6-  
361 GFP (Figure 3D-3F), we found that inner kinetochore protein Cnp20 showed normal  
362 location at the centromeres during interphase in *wt* (Figure 4A) as well as *sad1.2*  
363 *csi1Δ* cells, even though when these are dissociated from the SPB (Figure 4B). In  
364 contrast, we noticed that the Ndc80-GFP and Nuf2-GFP signals are absent at the  
365 centromeres when these are totally dissociated from the SPB during interphase  
366 (Figure 4D and Supplementary Figure 1). The outer kinetochore complex is probably  
367 not stable at the centromeres in interphase without the interaction with the SPB. This  
368 is important because, so far, it was believed that loss of Ndc80 or Nuf2 leads to  
369 centromere declustering as naturally occurs in meiosis (Asakawa et al. 2005);  
370 however, both proteins require their interaction with the SPB to be persistently

371 associated to the centromeres. We hypothesized that, once Ndc80 and Nuf2 are  
372 dislocated from the centromere due to the absence of contact with the SPB, this  
373 centromere will not be able to interact more and will be declustered from the SPB  
374 until mitotic onset. Current studies aim to decipher the basis for the refunding of  
375 centromere-SPB interactions after a dissociation. We did not find this phenotype in  
376 the *sad1.2* or *csi1Δ* single mutants, meaning that the disassembly of outer kinetochore  
377 components requires, at least, *transient* total centromere-SPB dissociation (Figure  
378 4E). Thus, together with the previous observation that the loss of the kinetochore  
379 proteins impacts on the Rab1 configuration, our results now suggest that this  
380 relationship is bidirectional: removing the Rab1 configuration by mutation of the NE  
381 proteins Csi1 and Sad1 causes the outer kinetochore proteins to disperse from the  
382 centromeres in interphase. Moreover, the fact that *sad1.2* and *csi1Δ* single mutants at  
383 normal growth conditions (32°C) always show at least one centromere interaction  
384 with the SPB is probably enough to maintain the outer kinetochore structure since the  
385 interaction between centromeres and SPB is dynamic, and centromeres tend to be  
386 permanently associated to the SPB during fission yeast interphase. Hence, if the  
387 centromere is permanently dissociated from the SPB for enough time, it is likely that  
388 the outer kinetochore loses stability or biochemical signals to continue associated  
389 with the centromere, being disassembled. This situation only could occur when all  
390 centromeres are declustered from the SPB (transiently or permanently), which occurs  
391 in *sad1.2 csi1Δ* cells but not in the *sad1.2* or *csi1Δ* single mutants. The role of the  
392 centromeric region in the SPB insertion into the NE (Fernandez-Alvarez et al. 2016),  
393 a yeast specific mechanism, might be the reason for the conservation of the Rab1  
394 configuration in fission yeast and, consequently, the preservation of the outer  
395 kinetochore structure throughout the cell cycle.

396

### 397 **The outer kinetochore accumulates at the mitotic onset.**

398 During the analysis, we noticed that although Ndc80 and Nuf2 signals are  
399 absent in interphase *sad1.2 csi1Δ* cells, these proteins are located at the centromeres  
400 in mitotic cells, which is easily recognizable by the presence of two SPBs (Figure 4  
401 and Supplementary Figure 1). This observation indicated that the outer kinetochore  
402 was able to be reconstructed at the mitotic onset to prepare the cells for chromosome  
403 segregation. In more detail, we found that Ndc80-GFP and Nuf2-GFP signals  
404 accumulate during late prophase 20-30 min before SPB separation, gradually



405 increasing until reaching similar levels to *wt* cells. This accumulation of Ndc80 at the  
406 centromeres is never seen in a *wt* setting (Figure 1) and precedes the later increment  
407 of the protein observed during anaphase (Dhatchinamoorthy et al. 2017). Hence, the  
408 outer kinetochore, or at least, Ndc80 and Nuf2, two core proteins of the structure, are  
409 actively accumulated at mitotic onset in fission yeast in a similar manner, in terms of  
410 the timing, to those seen in metazoan. The reason why this mechanism has not been  
411 observed before is that the Rab1 configuration masks it. A plausible explanation is that  
412 the maintenance of the Rab1 configuration during interphase appeared in evolution  
413 later to the disassembly and reassembly of the outer kinetochore complex. According  
414 to this hypothesis, the Rab1 configuration function of controlling the SPB insertion  
415 into the NE, a yeast-specific mechanism, favors that Ndc80 and Nuf2 stay stable at  
416 the centromeres to maintain centromere-SPB interactions. Using our approach,  
417 involving the removal of the Rab1 configuration, the outer kinetochore is  
418 disassembled, but the program to accumulate these proteins at the centromeres in the  
419 G2/M transition is conserved and triggered as in metazoans. In fact, the controlled  
420 accumulation of the outer kinetochore proteins preceding chromosome segregation is  
421 naturally active in fission yeast meiosis, since Ndc80 and Nuf2 are accumulated  
422 around 20-30 min before meiosis I (Asakawa et al. 2005). In meiosis, the Rab1  
423 conformation is substituted by the telomere bouquet, a meiotic prophase-specific  
424 conformation where the telomeres cluster together at the SPB; during this stage,  
425 centromeres are not associated to the SPB, in a similar scenario to that seen in our  
426 system using the double mutation *sad1.2 csi1Δ*. We think that fission yeast could  
427 reuse this conserved program in mitosis, mimicking the meiotic scenario.

428 Here we showed evidence of unexpected interphase dispersion and pre-mitotic  
429 gradual accumulation of two of the main protein complexes, which are integral  
430 elements of the outer kinetochore. So far, it has been known that Ndc80 and Nuf2  
431 protein levels at the centromeres were maintained throughout mitotic interphase.  
432 Astonishingly, our data suggest that the mechanisms controlling the disassembly and  
433 reassembly of the outer kinetochore might also be conserved in fission yeast.  
434 Disclosing the existence of this mechanism in *S. pombe* opens up the possibility of  
435 future studies using this yeast model to explore the mammalian kinetochore  
436 disassembly/assembly program.

437  
438

439 **Figure Legends**

440 **Figure 1. Outer kinetochore components Ndc80-GFP and Nuf2-GFP signal**  
441 **intensities at the SPB stay stable throughout interphase.**

442 (A-E) (Left panels) Frames from films of cells carrying Sid4-mCherry (endogenously  
443 tagged; SPB), ectopically expressed mCherry-Atb2 (controlled by *nda3* promoter;  
444 Tubulin) and GFP-endogenously tagged Mis6, Cnp20, Mis12, Nuf2 and Ndc80 as  
445 different kinetochore markers. Numbering indicates mitotic progression in minutes; t  
446 = 0 means first frame after SPB duplication. Bars, 5  $\mu$ m. (Right panels) Mean Mis6-  
447 GFP, Cnp20-GFP, Mis12-GFP, Nuf2-GFP, and Ndc80-GFP intensities at the SPB  
448 throughout interphase and mitosis were quantified for each kinetochore marker (N=10  
449 each). Error bars represent standard deviation. The data shown are from more than  
450 three independent experiments.

451

452 **Figure 2. The interphase Rab1 chromosome configuration in fission yeast is**  
453 **independent of microtubules and actin.**

454 (A-B) Live fluorescent microscopy images of *wt* interphase cells harboring Mis6-GFP  
455 and SPB and tubulin tagged as in Figure 1. (A) Top panel: in interphase, centromeres stay  
456 clustered together colocalizing with the SPB. Bottom panel: addition of the  
457 microtubule-depolymerizing drug carbendazim (MBC, 15  $\mu$ g/mL) leads to loss of  
458 microtubules signal (proving microtubules depolymerization and thus efficacy of the  
459 MBC treatment), but the clustering of centromeres and co-localization with the SPB  
460 remains identical to that seen in a control setting. (B) A similar treatment was  
461 performed using Latrunculin A (Lat A, 6  $\mu$ M). F-Actin was visualized with the GFP-  
462 tagged Life Actin label. After the addition of Lat A, actin depolymerizes, but  
463 centromeres remain clustered and associated with the SPB. (C-E) Quantification of  
464 the analysis performed in A and B (see Methods). (C) Scheme of the obtention of  
465 centromere (Mis6-GFP) and SPB (Sid4-mCherry) intensity profiles. (D) Calculation  
466 of the distance between the centromere and SPB dots. (E) Quantification of the  
467 distance between centromeres and SPB in interphase with and without MBC or Lat A.  
468 (F) Schematic of the centromere-SPB organization during interphase in *wt* and *sad1.2*  
469 cells, at 32°C and 36°C. ONM, outer nuclear membrane; INM, inner nuclear  
470 membrane. (G) Quantification of centromere-SPB dissociations. Tags as in Figure 1;  
471 centromeres in *wt* and *sad1.2* settings were visualized via Mis6-GFP. Scale bar means  
472 5  $\mu$ m. N = 50 for each genotype. No asterisk depicts no statistically significant

473 difference. Fisher's exact test: \*\*\*\*\*,  $p < 0.0001$ . (H) Drop dilution-assays. Sensitivity  
474 of the different strains analyzed to chronic treatment with MBC. Serial dilutions (5-  
475 fold) of normalized exponentially growing cultures were spotted onto YES plates  
476 containing DMSO (control) or different amounts of MBC, as indicated, and incubated  
477 at 32°C for 48 h.

478

479

480

481 **Figure 3. Loss of Csi1 in *sad1.2* cells leads to a higher rate of total centromere**  
482 **dissociation from the SPB without severely compromising cell viability**

483 (A) *sad1.2 lem2Δ csi1Δ* cells present a synthetic lethality when spores germinate after  
484 tetrads dissection analysis. An example of the *sad1.2 csi1Δ* and *lem2Δ csi1Δ* cross is  
485 shown. Spores were grown at 32°C for 5 days. (B) Cell viability after combining *csi1*  
486 deletion, *lem2* deletion, and/or the presence of the thermosensitive *sad1.2* allele. Cells  
487 growing in YES medium for 16 h were diluted in fresh medium during two generation  
488 times, normalized to  $6 \times 10^6$  cells /ml, plated onto YES plates, and incubated for 72 h  
489 at 32°C (N = 4). Fisher's exact test was used to determine *p-values* between wild-type  
490 and mutant strains; \* $p < 0.05$ . (C) Drop dilution-assays. Sensitivity of the different  
491 analyzed strains to chronic treatment with MBC. Serial dilutions (5-fold) of  
492 normalized exponentially growing cultures were spotted as indicated in Figure 2H.  
493 (D-F) Frames from films of proliferating cells; SPBs and spindles are visualized as in  
494 Figure 1. Centromeres were visualized via Mis6-GFP. Scale bar represents 5  $\mu\text{m}$ . (G-  
495 I) Quantification of the phenotypes shown in D-F (see main text for details), in each  
496 genotype scoring more than 30 cells in, at least, three independent experiments. *p-*  
497 *values* between *sad1.2 csi1Δ* and *lem2 csi1Δ* were determined by Fisher's exact test;  
498 \*\* $p < 0.01$ , \* $p < 0.05$ .

499

500 **Figure 4. Outer kinetochore component Ndc80 is disassembled in interphase and**  
501 **assembled at mitotic onset in Rab1-deficient cells.**

502 (A-D) Frames from films of mitotic cells; tags and numbers as in Figure 1. Scale bars  
503 represent 5  $\mu\text{m}$ . Green asterisks indicate the presence of the Ndc80 signal. (E-F)  
504 Quantification of the centromere signals (tags as in Figure 1); N=50 for each genotype  
505 with more than three independent experiments. *p-value* was determined by Fisher's  
506 exact test, \*\*\*\*\*,  $p < 0.0001$ . Cells were scored as negative when the kinetochore

507 signal was missed during all interphase frames and was recovered around 20 min  
508 before mitosis.

509 **Figure 5. Outer kinetochore delocalization and localization in Rabl-deficient cells**  
510 **during the cell cycle remind the scenario in metazoan.**

511 Cell cycle progression in metazoan and fission yeast with and without interphase Rabl  
512 chromosome configuration. (A) In metazoan, CENP-A and CCAN (constitutive  
513 centromere-associated network) are constitutively associated with centromeres during  
514 the cell cycle. Ndc80 complex is assembled and accumulated at centromeres in  
515 prophase, and it is delocalized during late anaphase-telophase. (B) In fission yeast,  
516 interphase Rabl chromosome configuration requires the constitutive localization of  
517 Ndc80 at centromeres. (C) Abolition of the Rabl configuration discloses a  
518 delocalization and accumulation cycle of Ndc80 in fission yeast, similar to metazoan.

519

520 **Supplementary Figure 1. Additional views of the delocalization and**  
521 **accumulation of the outer kinetochore in Rabl deficient cells (Supplement to**  
522 **Figure 4).**

523 (A-B) Ndc80-GFP and (C-D) Nuf2-GFP signals at the SPB during mitotic interphase  
524 are lost with *sad1.2 csi1*Δ mutations. Tags and numbering as in Figure 1. Scale bars  
525 represent 5 μm. Green asterisks indicate the presence of Ndc80-GFP or Nuf2-GFP  
526 signals.

527

## 528 **METHODS**

### 529 **Strains and growth conditions**

530 Strains' growth conditions and molecular biology approaches (Moreno, Klar, and  
531 Nurse 1991) were used. Gene deletion and C-terminal tagging were performed as  
532 described (Bahler et al. 1998; Fennell et al. 2015). pFA6a plasmids were used to  
533 amplify kanMX6, hphMX6, and natMX6 resistance cassettes. Insertions of mCherry-  
534 Atb2 at the *aur1* locus (Hashida-Okado et al. 1998) utilized pYC19-mCherryAtb2  
535 (Nakamura et al. 2011) provided by T. Toda (Hiroshima University). Expand Long  
536 Template polymerase (Roche) was used for PCR. Haploid cells were usually grown at  
537 32 °C in YE4S or EMM media. Final concentrations of aureobasidin A (0.5 μg/mL),  
538 nourseothricin (100 μg/mL clonNAT), G418 (150 μg/mL geneticin) and hygromycin  
539 B (300 μg/mL) were added for selection purpose. Strains used in this study are listed  
540 in Supplementary Table 1.

541

542 **Sensitivity assays.** Strains were revived in solid YES medium, then aerobically  
543 precultured up to saturation (D.O. = 1) and subcultured in YES liquid medium with 180  
544 rpm agitation, until D.O. = 0.5 - 0.7 is reached (interphase). Cell viability of normalized  
545 exponentially growing cell cultures to  $6 \times 10^6$  cells/ml was determined by plating cells in  
546 triplicate onto YE4S plates and counting colony-forming units after five days incubation  
547 at 32°C. For drop-dilution assays, cells growing exponentially at 32°C were normalized  
548 to  $6 \times 10^6$  cells/ml, and 5-fold serial dilutions were spotted onto YE4S plates containing  
549 different concentrations of MBC. The plates were incubated at 32°C for 48-72 h.

550

### 551 **Fluorescence microscopy, live analysis, and quantification**

552 Fluorescence microscopy images were generated using the DeltaVision microscope  
553 system (Applied Precision, Seattle, WA). Cells were adhered to 35 mm glass culture  
554 dishes (MatTek) using 0.2 mg/ml soybean lectin (Sigma) and immersed in EMM  
555 (with required supplements). Time-lapse imaging was carried out at 27 °C in an  
556 Environmental Chamber with a DeltaVision Spectris (Applied Precision) comprising  
557 an Olympus IX70 widefield inverted epifluorescence microscope, an Olympus  
558 UPlanSapo 100x NA 1.4 oil immersion objective, and a Photometrics CCD CoolSnap  
559 HQ camera. Images were acquired over 26 focal planes at a 0.35  $\mu\text{m}$  step size. For the  
560 quantification of protein fluorescence intensity, maximum-projected raw microscopy  
561 data were corrected for photo-bleaching via the Exponential Fitting method. Foci  
562 intensity time-series were obtained after detection with a Laplacian of Gaussian filter  
563 and tracking with the LAP algorithm (TrackMate). Tracks were time-aligned  
564 according to splitting events, and intensities were normalized respect to background  
565 mean intensity. Images were further deconvolved and combined into a 2D image  
566 using the maximum intensity projection setting using softWoRx (Applied Precision).  
567 Image processing and analysis were performed using Adobe Photoshop 2020.

568

### 569 **Carbendazim and latrunculin treatments**

570 For carbendazim treatment, a working solution of YES+MBC (15  $\mu\text{g}/\text{mL}$ )  
571 (carbendazim, CAS No. 10605-21-7) is prepared using a stock solution of  
572 DMSO+MBC (2.5 mg/mL). Strains were revived in solid YES medium, then  
573 aerobically precultured up to saturation (D.O. = 1) and subcultured, in both cases in  
574 YES liquid medium with 180 rpm agitation, until D.O. = 0.3 - 0.4 is reached

575 (interphase). 50  $\mu$ L of lectin (0.2  $\mu$ g/mL) (Sigma Aldrich, L1395) is used for cell  
576 immobilization on a  $\mu$ -Slide 8 Well Uncoated (ibidi GmbH). YES+MBC (experiment)  
577 or YES (control) medium is used for filming cells.

578 For latrunculin A treatment, exponentially growing cells were incubated 10 min in 3  
579 mL of YES rich medium with a total concentration of latrunculin A of 6  $\mu$ M (15  $\mu$ L  
580 of a 1 mM stock). After incubation, cells are immobilized with lectin as in MBC  
581 treatment on a coverslip and mounted into a microscope slide (Linealab) for image  
582 acquisition.

583 For live microscopy, images were taken with 100 ms and 50 ms of exposure time for  
584 fluorescent and brightfield channels, respectively, and 13 focal planes with a 0.5  $\mu$ m  
585 step size, using a spinning disk confocal microscopy system (Photometrics Evolve  
586 camera; Olympus 100x 1.4 NA oil immersion objective; Roper Scientific). For the co-  
587 localization analysis, maximum Z-projection images of interphase cells, those with  
588 one single Sid4-mCherry dot (SPB), were subjected to co-localization analysis. For  
589 each cell, an axis containing the center of both Sid4-mCherry and Mis6-GFP  
590 (centromeres) dots is drawn, and the intensity of the pixels from both channels is  
591 measured, normalized and plotted along such axis. The resultant intensity profiles are  
592 used to measure the distance between the dots, defined as the distance in microns  
593 between the x-coordinates of the intensity maxima of both profiles, considered to  
594 correspond with the center of the dots.

595

## 596 **Acknowledgments**

597 We thank all lab members for critical comments on the manuscript; Alejandra Cano  
598 for technical support; and the CABD microscopy facility technician Katherina García.  
599 We would like to thank the Genetics Department and Springboard lab for their useful  
600 discussion and comments, especially Víctor Carranco for technical support. This work  
601 was supported by the Spanish Government, Plan Nacional project PGC2018-098118-  
602 A-I00 and Ramon y Cajal program, RyC-2016-19659 to AF-A; by the Pablo de  
603 Olavide University “Ayuda Puente Predoctoral” fellowship (PPI1803) to AP-S; and  
604 by the Spanish Education and Professional Formation Ministry, Research  
605 Collaboration Grant to DL-P. The CABD is an institution funded by Pablo de Olavide  
606 University, Consejo Superior de Investigaciones Científicas (CSIC), and Junta de  
607 Andalucía.

608

609 **Author contributions**

610 AF-A. designed the study; AJ-M and AP-S. performed most of the experiments with  
611 the support of DL-P. DD-G and LM-T contributed to Figure 2; AF-A. acquired  
612 funding and supervised the project; AF-A. wrote the manuscript with support of AJ-  
613 M, AP-S, and DL-P.

614

615 **References**

616

617

- 618 Asakawa, H., A. Hayashi, T. Haraguchi, and Y. Hiraoka. 2005. 'Dissociation of the Nuf2-  
619 Ndc80 complex releases centromeres from the spindle-pole body during meiotic  
620 prophase in fission yeast', *Mol Biol Cell*, 16: 2325-38.
- 621 Bahler, J., J. Q. Wu, M. S. Longtine, N. G. Shah, A. McKenzie, 3rd, A. B. Steever, A. Wach, P.  
622 Philippsen, and J. R. Pringle. 1998. 'Heterologous modules for efficient and versatile  
623 PCR-based gene targeting in *Schizosaccharomyces pombe*', *Yeast*, 14: 943-51.
- 624 Barrales, R. R., M. Forn, P. R. Georgescu, Z. Sarkadi, and S. Braun. 2016. 'Control of  
625 heterochromatin localization and silencing by the nuclear membrane protein  
626 Lem2', *Genes Dev*, 30: 133-48.
- 627 Biggins, S. 2013. 'The composition, functions, and regulation of the budding yeast  
628 kinetochore', *Genetics*, 194: 817-46.
- 629 Bystricky, K., P. Heun, L. Gehlen, J. Langowski, and S. M. Gasser. 2004. 'Long-range  
630 compaction and flexibility of interphase chromatin in budding yeast analyzed by  
631 high-resolution imaging techniques', *Proc Natl Acad Sci U S A*, 101: 16495-500.
- 632 Carpy, A., K. Krug, S. Graf, A. Koch, S. Popic, S. Hauf, and B. Macek. 2014. 'Absolute  
633 proteome and phosphoproteome dynamics during the cell cycle of  
634 *Schizosaccharomyces pombe* (Fission Yeast)', *Mol Cell Proteomics*, 13: 1925-36.
- 635 Cheeseman, I. M. 2014. 'The kinetochore', *Cold Spring Harb Perspect Biol*, 6: a015826.
- 636 Cheeseman, I. M., C. Brew, M. Wolyniak, A. Desai, S. Anderson, N. Muster, J. R. Yates, T. C.  
637 Huffaker, D. G. Drubin, and G. Barnes. 2001. 'Implication of a novel multiprotein  
638 Dam1p complex in outer kinetochore function', *J Cell Biol*, 155: 1137-45.
- 639 Cheeseman, I. M., and A. Desai. 2008. 'Molecular architecture of the kinetochore-  
640 microtubule interface', *Nat Rev Mol Cell Biol*, 9: 33-46.
- 641 Czapiewski, R., M. I. Robson, and E. C. Schirmer. 2016. 'Anchoring a Leviathan: How the  
642 Nuclear Membrane Tethers the Genome', *Front Genet*, 7: 82.
- 643 Dhatchinamoorthy, K., M. Mattingly, and J. L. Gerton. 2018. 'Regulation of kinetochore  
644 configuration during mitosis', *Curr Genet*, 64: 1197-203.
- 645 Dhatchinamoorthy, K., M. Shivaraju, J. J. Lange, B. Rubinstein, J. R. Unruh, B. D. Slaughter,  
646 and J. L. Gerton. 2017. 'Structural plasticity of the living kinetochore', *J Cell Biol*, 216:  
647 3551-70.
- 648 Fennell, A., A. Fernandez-Alvarez, K. Tomita, and J. P. Cooper. 2015. 'Telomeres and  
649 centromeres have interchangeable roles in promoting meiotic spindle formation', *J  
650 Cell Biol*, 208: 415-28.
- 651 Fernandez-Alvarez, A., C. Bez, E. T. O'Toole, M. Mophew, and J. P. Cooper. 2016. 'Mitotic  
652 Nuclear Envelope Breakdown and Spindle Nucleation Are Controlled by Interphase  
653 Contacts between Centromeres and the Nuclear Envelope', *Dev Cell*, 39: 544-59.



- 654 Fernandez-Alvarez, A., and J. P. Cooper. 2017a. 'Chromosomes Orchestrate Their Own  
655 Liberation: Nuclear Envelope Disassembly', *Trends Cell Biol*, 27: 255-65.
- 656 ———. 2017b. 'The functionally elusive Rab1 chromosome configuration directly regulates  
657 nuclear membrane remodeling at mitotic onset', *Cell Cycle*, 16: 1392-96.
- 658 Funabiki, H., I. Hagan, S. Uzawa, and M. Yanagida. 1993. 'Cell cycle-dependent specific  
659 positioning and clustering of centromeres and telomeres in fission yeast', *J Cell Biol*,  
660 121: 961-76.
- 661 Gu, Y., C. Yam, and S. Oliferenko. 2012. 'Divergence of mitotic strategies in fission yeasts',  
662 *Nucleus*, 3: 220-5.
- 663 Hagan, I., and M. Yanagida. 1995. 'The product of the spindle formation gene *sad1+*  
664 associates with the fission yeast spindle pole body and is essential for viability', *J*  
665 *Cell Biol*, 129: 1033-47.
- 666 Hara, M., and T. Fukagawa. 2018. 'Kinetochore assembly and disassembly during mitotic  
667 entry and exit', *Curr Opin Cell Biol*, 52: 73-81.
- 668 Hashida-Okado, T., R. Yasumoto, M. Endo, K. Takesako, and I. Kato. 1998. 'Isolation and  
669 characterization of the aureobasidin A-resistant gene, *aur1R*, on  
670 *Schizosaccharomyces pombe*: roles of *Aur1p+* in cell morphogenesis', *Curr Genet*,  
671 33: 38-45.
- 672 Hattersley, N., D. Cheerambathur, M. Moyle, M. Stefanutti, A. Richardson, K. Y. Lee, J.  
673 Dumont, K. Oegema, and A. Desai. 2016. 'A Nucleoporin Docks Protein  
674 Phosphatase 1 to Direct Meiotic Chromosome Segregation and Nuclear Assembly',  
675 *Dev Cell*, 38: 463-77.
- 676 Hiraoka, Y., and A. F. Dernburg. 2009. 'The SUN rises on meiotic chromosome dynamics',  
677 *Dev Cell*, 17: 598-605.
- 678 Hou, H., Z. Zhou, Y. Wang, J. Wang, S. P. Kallgren, T. Kurchuk, E. A. Miller, F. Chang, and S.  
679 Jia. 2012. 'Csi1 links centromeres to the nuclear envelope for centromere clustering',  
680 *J Cell Biol*, 199: 735-44.
- 681 Hsu, K. S., and T. Toda. 2011. 'Ndc80 internal loop interacts with Dis1/TOG to ensure proper  
682 kinetochore-spindle attachment in fission yeast', *Curr Biol*, 21: 214-20.
- 683 Huang, J., Y. Huang, H. Yu, D. Subramanian, A. Padmanabhan, R. Thadani, Y. Tao, X. Tang,  
684 R. Wedlich-Soldner, and M. K. Balasubramanian. 2012. 'Nonmedially assembled F-  
685 actin cables incorporate into the actomyosin ring in fission yeast', *J Cell Biol*, 199:  
686 831-47.
- 687 Janke, C., J. Ortiz, T. U. Tanaka, J. Lechner, and E. Schiebel. 2002. 'Four new subunits of the  
688 Dam1-Duo1 complex reveal novel functions in sister kinetochore biorientation',  
689 *EMBO J*, 21: 181-93.
- 690 Jin, Q., E. Trelles-Sticken, H. Scherthan, and J. Loidl. 1998. 'Yeast nuclei display prominent  
691 centromere clustering that is reduced in nondividing cells and in meiotic prophase',  
692 *J Cell Biol*, 141: 21-9.
- 693 Jin, Q. W., J. Fuchs, and J. Loidl. 2000. 'Centromere clustering is a major determinant of  
694 yeast interphase nuclear organization', *J Cell Sci*, 113 ( Pt 11): 1903-12.
- 695 Kume, K., H. Cantwell, A. Burrell, and P. Nurse. 2019. 'Nuclear membrane protein Lem2  
696 regulates nuclear size through membrane flow', *Nat Commun*, 10: 1871.
- 697 Liu, X., I. McLeod, S. Anderson, J. R. Yates, 3rd, and X. He. 2005. 'Molecular analysis of  
698 kinetochore architecture in fission yeast', *EMBO J*, 24: 2919-30.
- 699 Moreno, S., A. Klar, and P. Nurse. 1991. 'Molecular genetic analysis of fission yeast  
700 *Schizosaccharomyces pombe*', *Methods Enzymol*, 194: 795-823.
- 701 Nabetani, A., T. Koujin, C. Tsutsumi, T. Haraguchi, and Y. Hiraoka. 2001. 'A conserved  
702 protein, Nuf2, is implicated in connecting the centromere to the spindle during  
703 chromosome segregation: a link between the kinetochore function and the spindle  
704 checkpoint', *Chromosoma*, 110: 322-34.



- 705 Nagpal, H., and T. Fukagawa. 2016. 'Kinetochore assembly and function through the cell  
706 cycle', *Chromosoma*, 125: 645-59.
- 707 Nakamura, Y., A. Arai, Y. Takebe, and M. Masuda. 2011. 'A chemical compound for  
708 controlled expression of nmt1-driven gene in the fission yeast *Schizosaccharomyces*  
709 *pombe*', *Anal Biochem*, 412: 159-64.
- 710 Obuse, C., O. Iwasaki, T. Kiyomitsu, G. Goshima, Y. Toyoda, and M. Yanagida. 2004. 'A  
711 conserved Mis12 centromere complex is linked to heterochromatic HP1 and outer  
712 kinetochore protein Zwint-1', *Nat Cell Biol*, 6: 1135-41.
- 713 Riedl, J., A. H. Crevenna, K. Kessenbrock, J. H. Yu, D. Neukirchen, M. Bista, F. Bradke, D.  
714 Jenne, T. A. Holak, Z. Werb, M. Sixt, and R. Wedlich-Soldner. 2008. 'Lifeact: a  
715 versatile marker to visualize F-actin', *Nat Methods*, 5: 605-7.
- 716 Shimanuki, M., F. Miki, D. Q. Ding, Y. Chikashige, Y. Hiraoka, T. Horio, and O. Niwa. 1997. 'A  
717 novel fission yeast gene, *kms1+*, is required for the formation of meiotic prophase-  
718 specific nuclear architecture', *Mol Gen Genet*, 254: 238-49.
- 719 Strecker, J., G. D. Gupta, W. Zhang, M. Bashkurov, M. C. Landry, L. Pelletier, and D.  
720 Durocher. 2016. 'DNA damage signalling targets the kinetochore to promote  
721 chromatin mobility', *Nat Cell Biol*, 18: 281-90.
- 722 Swaffer, M. P., A. W. Jones, H. R. Flynn, A. P. Snijders, and P. Nurse. 2016. 'CDK Substrate  
723 Phosphorylation and Ordering the Cell Cycle', *Cell*, 167: 1750-61 e16.
- 724 Taddei, A., and S. M. Gasser. 2012. 'Structure and function in the budding yeast nucleus',  
725 *Genetics*, 192: 107-29.
- 726 Takahashi, K., E. S. Chen, and M. Yanagida. 2000. 'Requirement of Mis6 centromere  
727 connector for localizing a CENP-A-like protein in fission yeast', *Science*, 288: 2215-9.
- 728 Tange, Y., Y. Chikashige, S. Takahata, K. Kawakami, M. Higashi, C. Mori, T. Kojidani, Y.  
729 Hirano, H. Asakawa, Y. Murakami, T. Haraguchi, and Y. Hiraoka. 2016. 'Inner  
730 nuclear membrane protein Lem2 augments heterochromatin formation in response  
731 to nutritional conditions', *Genes Cells*, 21: 812-32.
- 732 Therizols, P., T. Duong, B. Dujon, C. Zimmer, and E. Fabre. 2010. 'Chromosome arm length  
733 and nuclear constraints determine the dynamic relationship of yeast subtelomeres',  
734 *Proc Natl Acad Sci U S A*, 107: 2025-30.
- 735 Trelles-Sticken, E., C. Adelfalk, J. Loidl, and H. Scherthan. 2005. 'Meiotic telomere  
736 clustering requires actin for its formation and cohesin for its resolution', *J Cell Biol*,  
737 170: 213-23.
- 738 Unruh, J. R., B. D. Slaughter, and S. L. Jaspersen. 2018. 'Functional Analysis of the Yeast  
739 LINC Complex Using Fluctuation Spectroscopy and Super-Resolution Imaging',  
740 *Methods Mol Biol*, 1840: 137-61.
- 741 Wigge, P. A., and J. V. Kilmartin. 2001. 'The Ndc80p complex from *Saccharomyces*  
742 *cerevisiae* contains conserved centromere components and has a function in  
743 chromosome segregation', *J Cell Biol*, 152: 349-60.
- 744

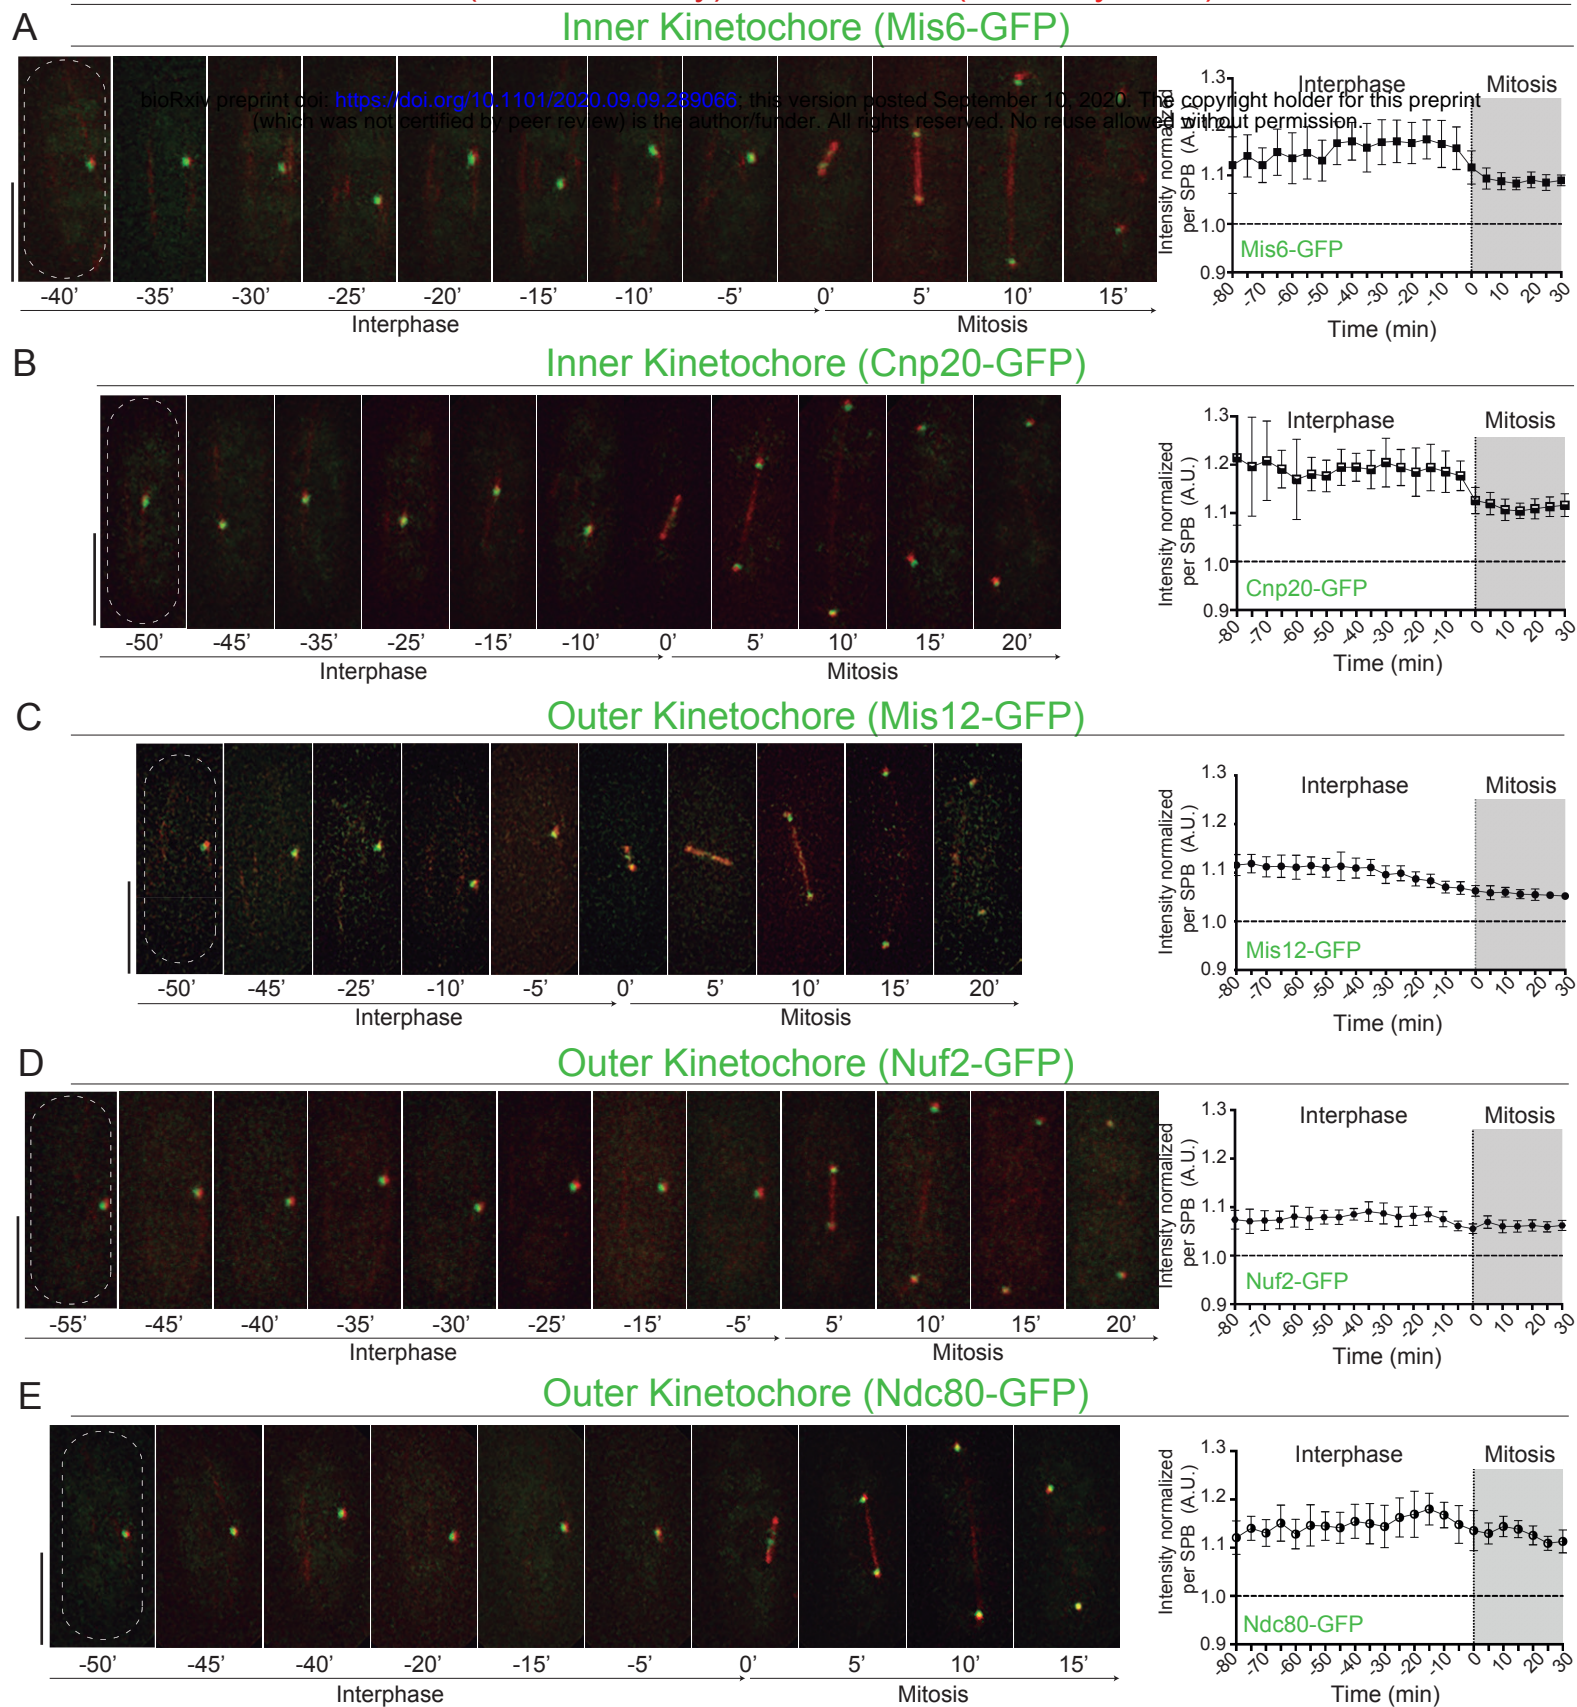

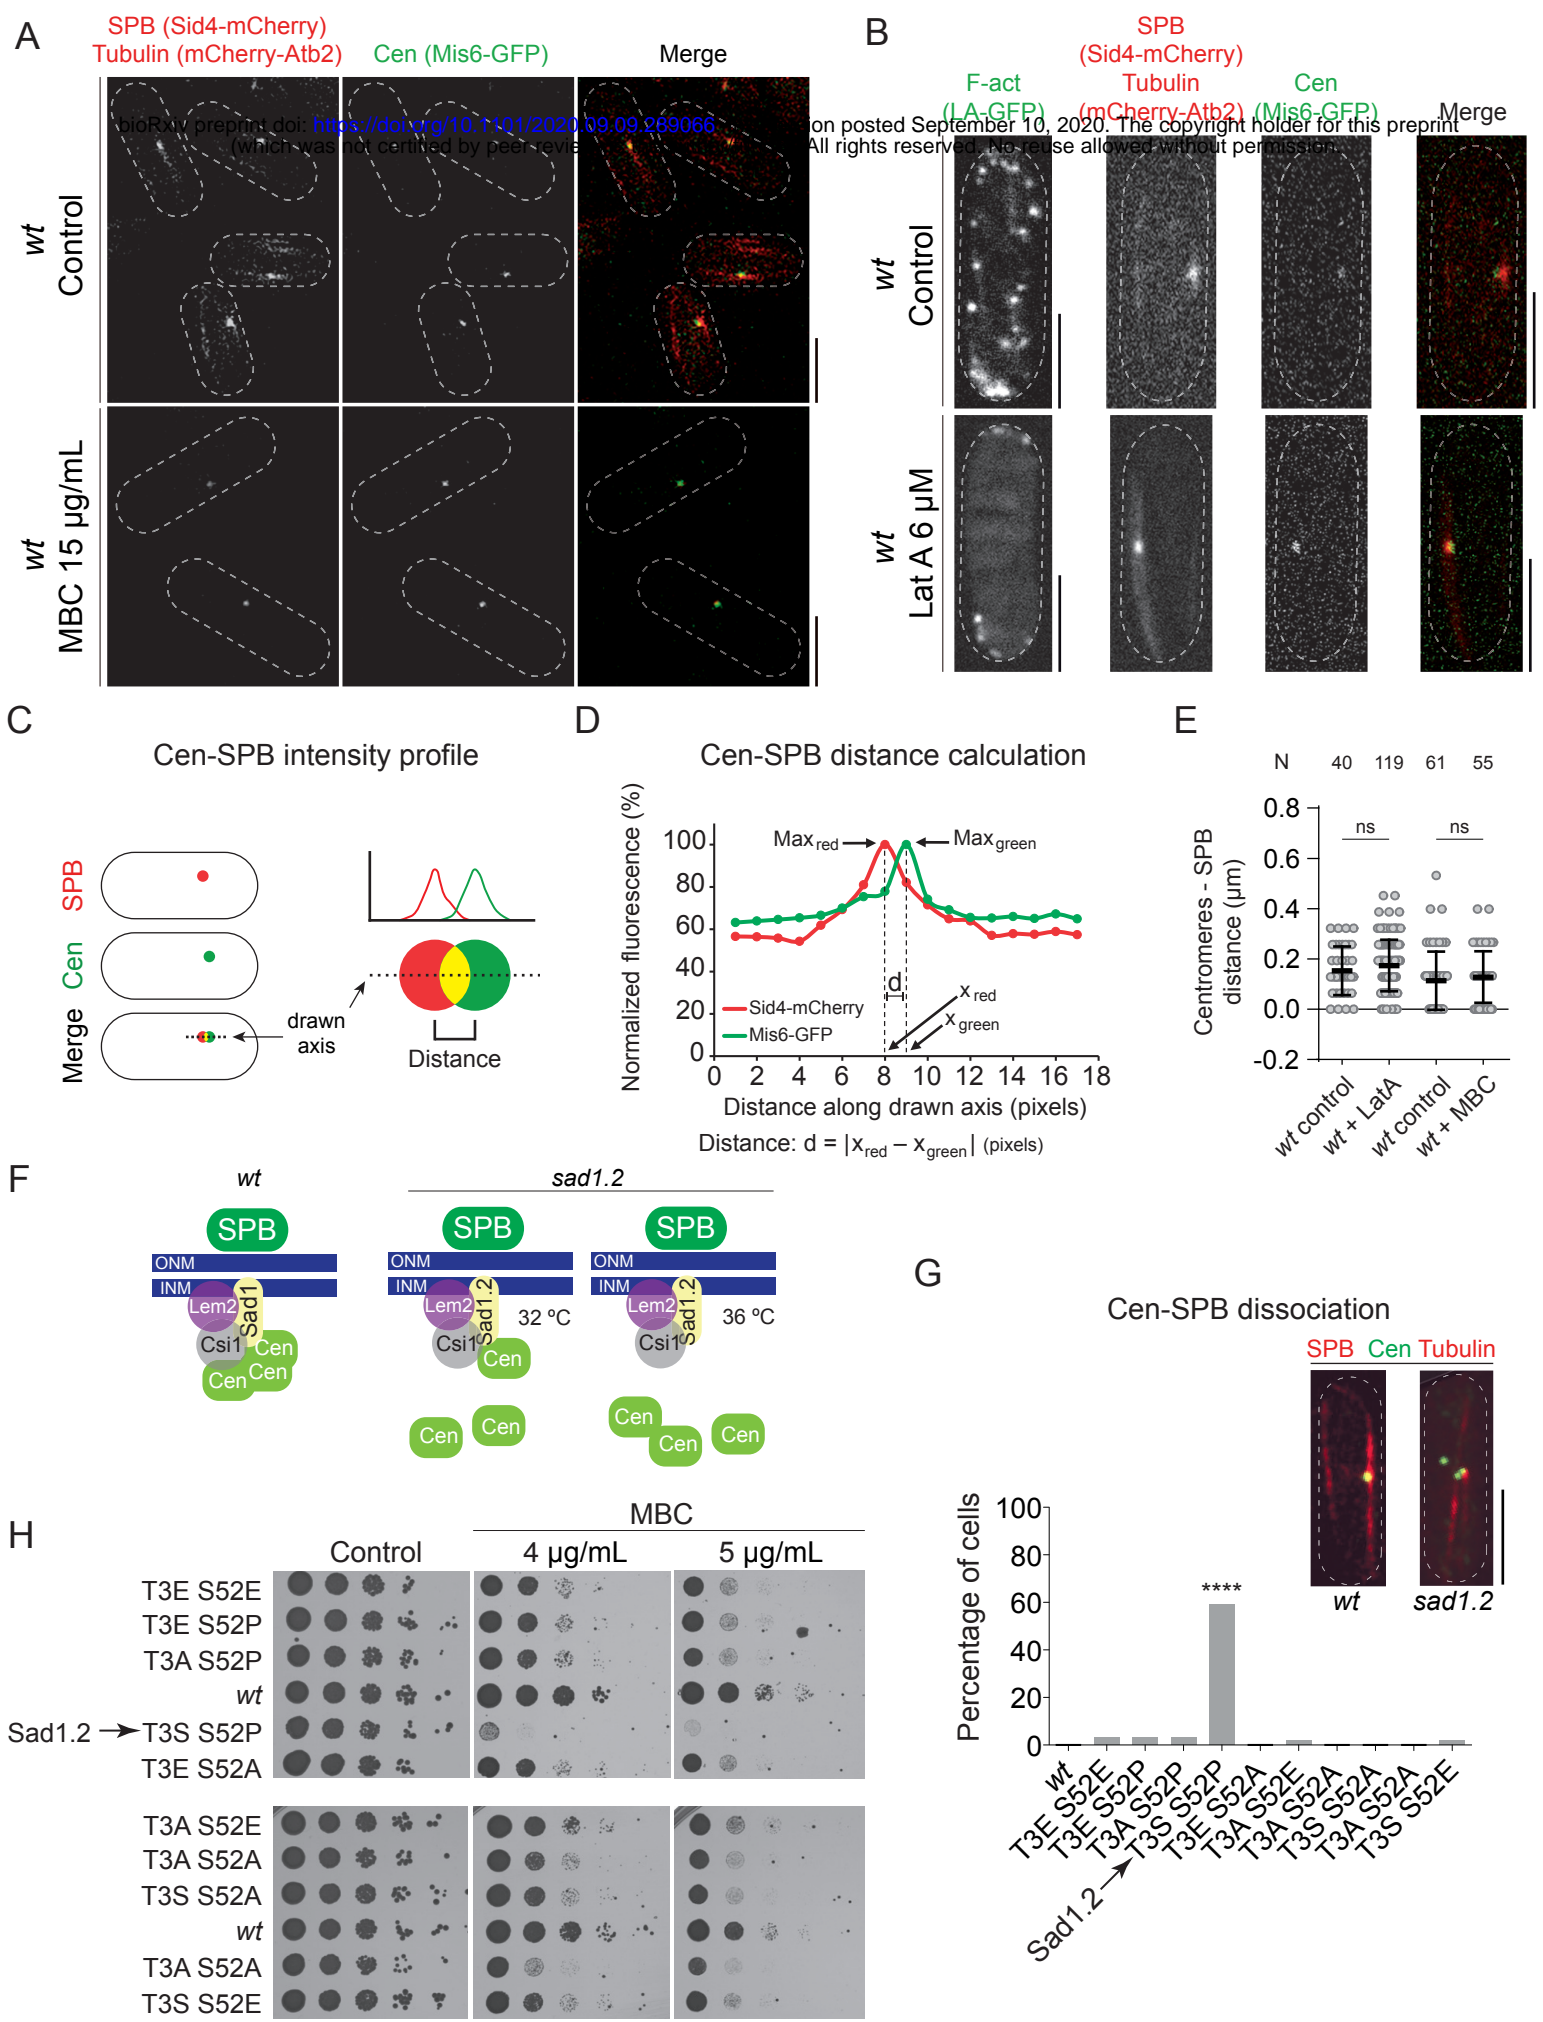

bioRxiv preprint doi: <https://doi.org/10.1101/2020.09.09.289066>; this version posted September 10, 2020. The copyright holder for this preprint (which was not certified by peer review) is the author/funder, who has granted bioRxiv a license to display the preprint in perpetuity. It is made available under aCC-BY-NC-ND 4.0 International license.

bioRxiv preprint doi: <https://doi.org/10.1101/2020.09.09.289066>; this version posted September 10, 2020. The copyright holder for this preprint (which was not certified by peer review) is the author/funder, who has granted bioRxiv a license to display the preprint in perpetuity. It is made available under aCC-BY-NC-ND 4.0 International license.



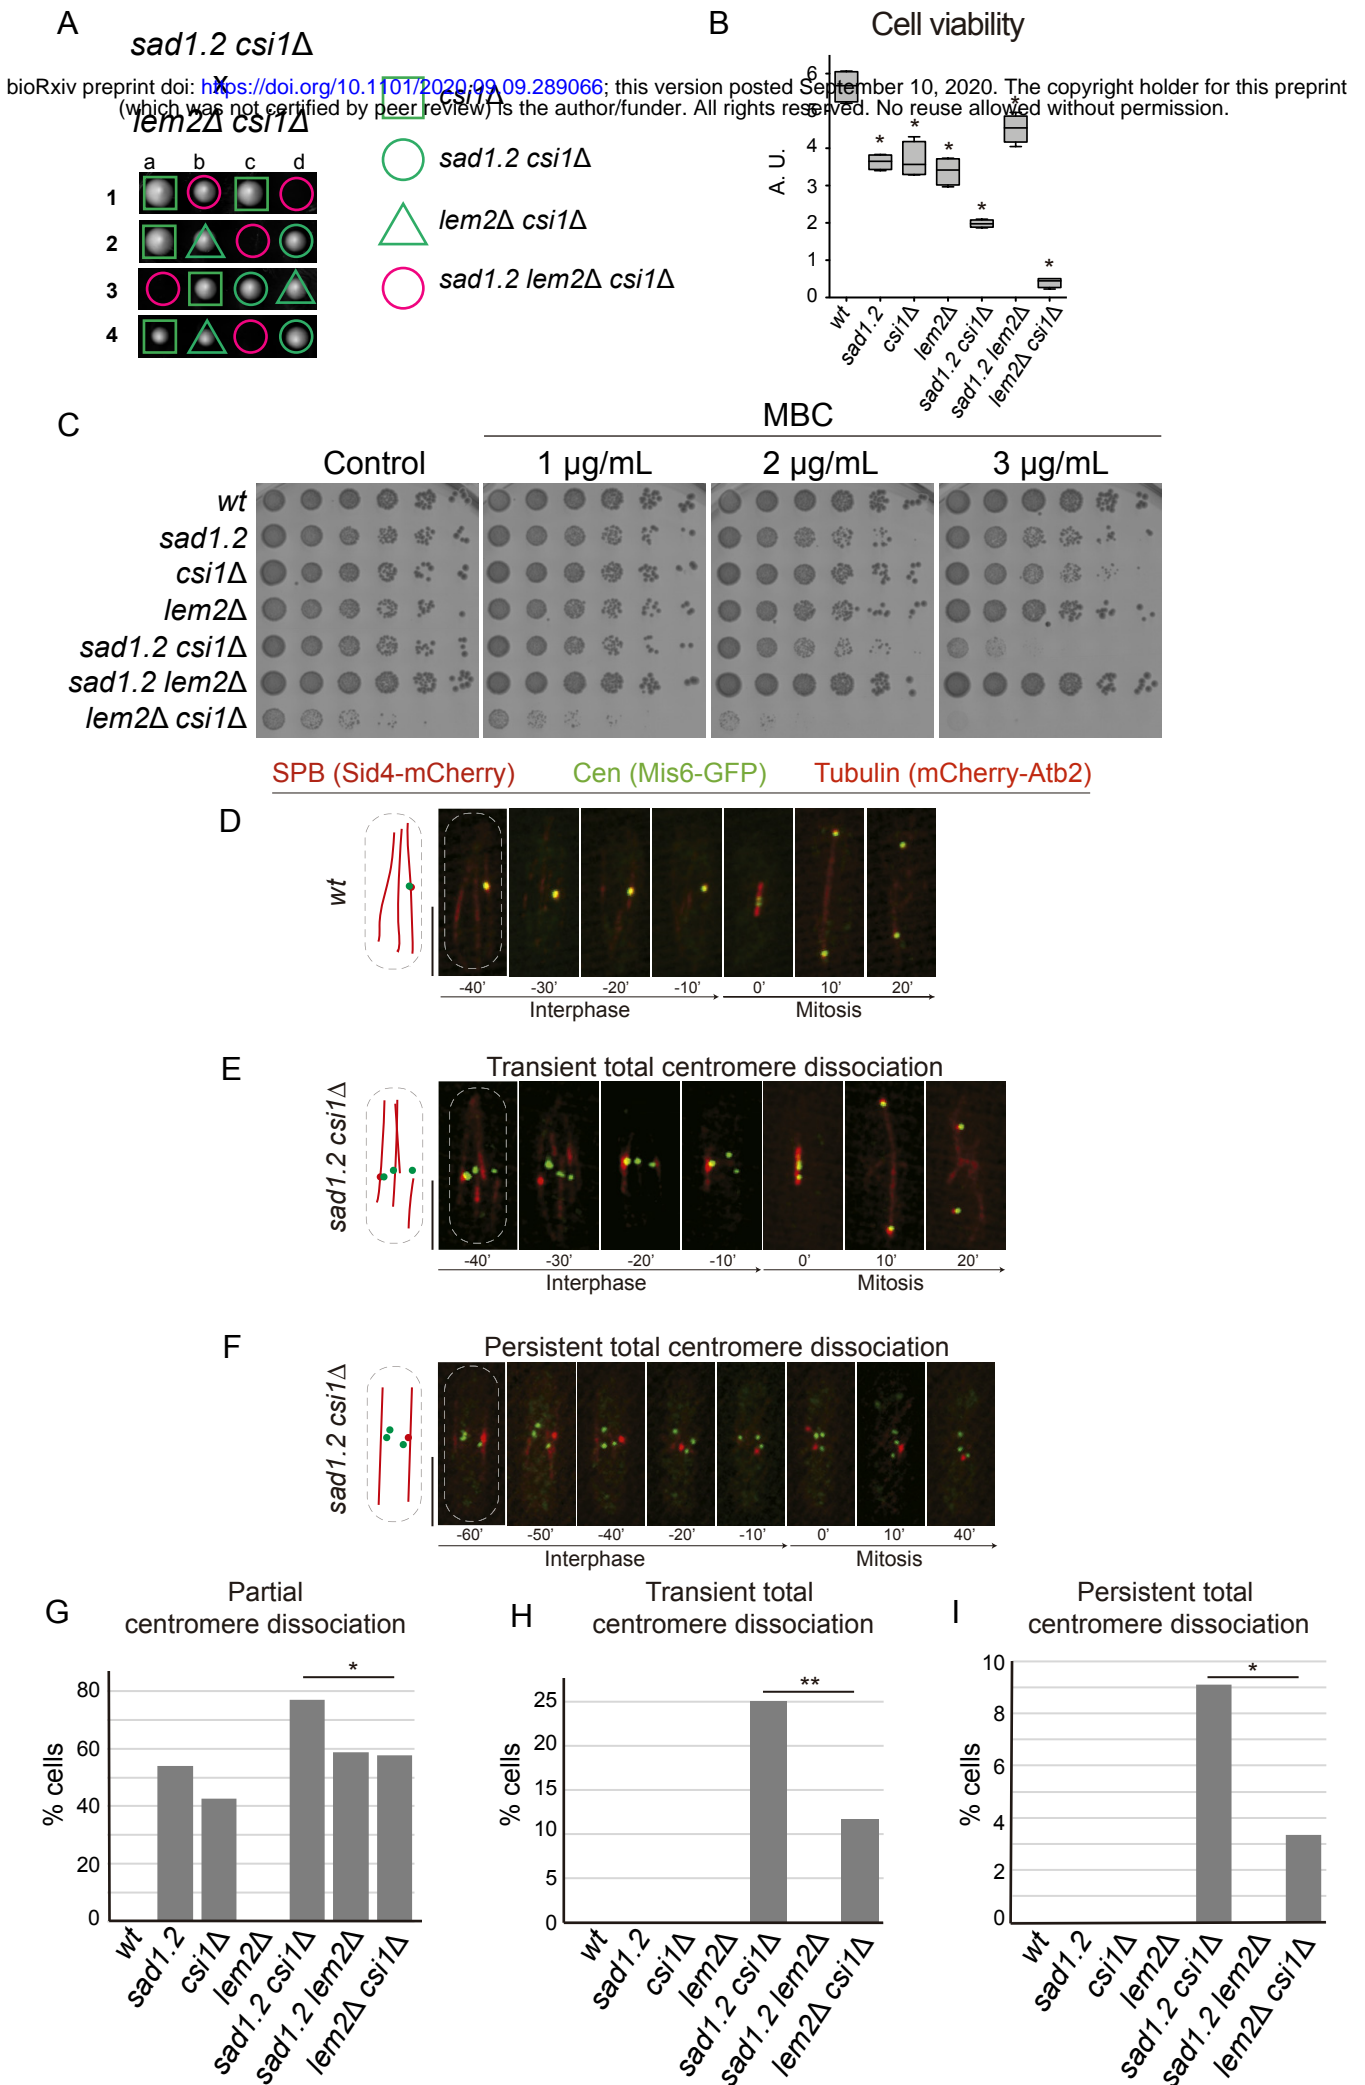

## SPB (Sid4-mCherry) Tubulin (mCherry-Atb2)

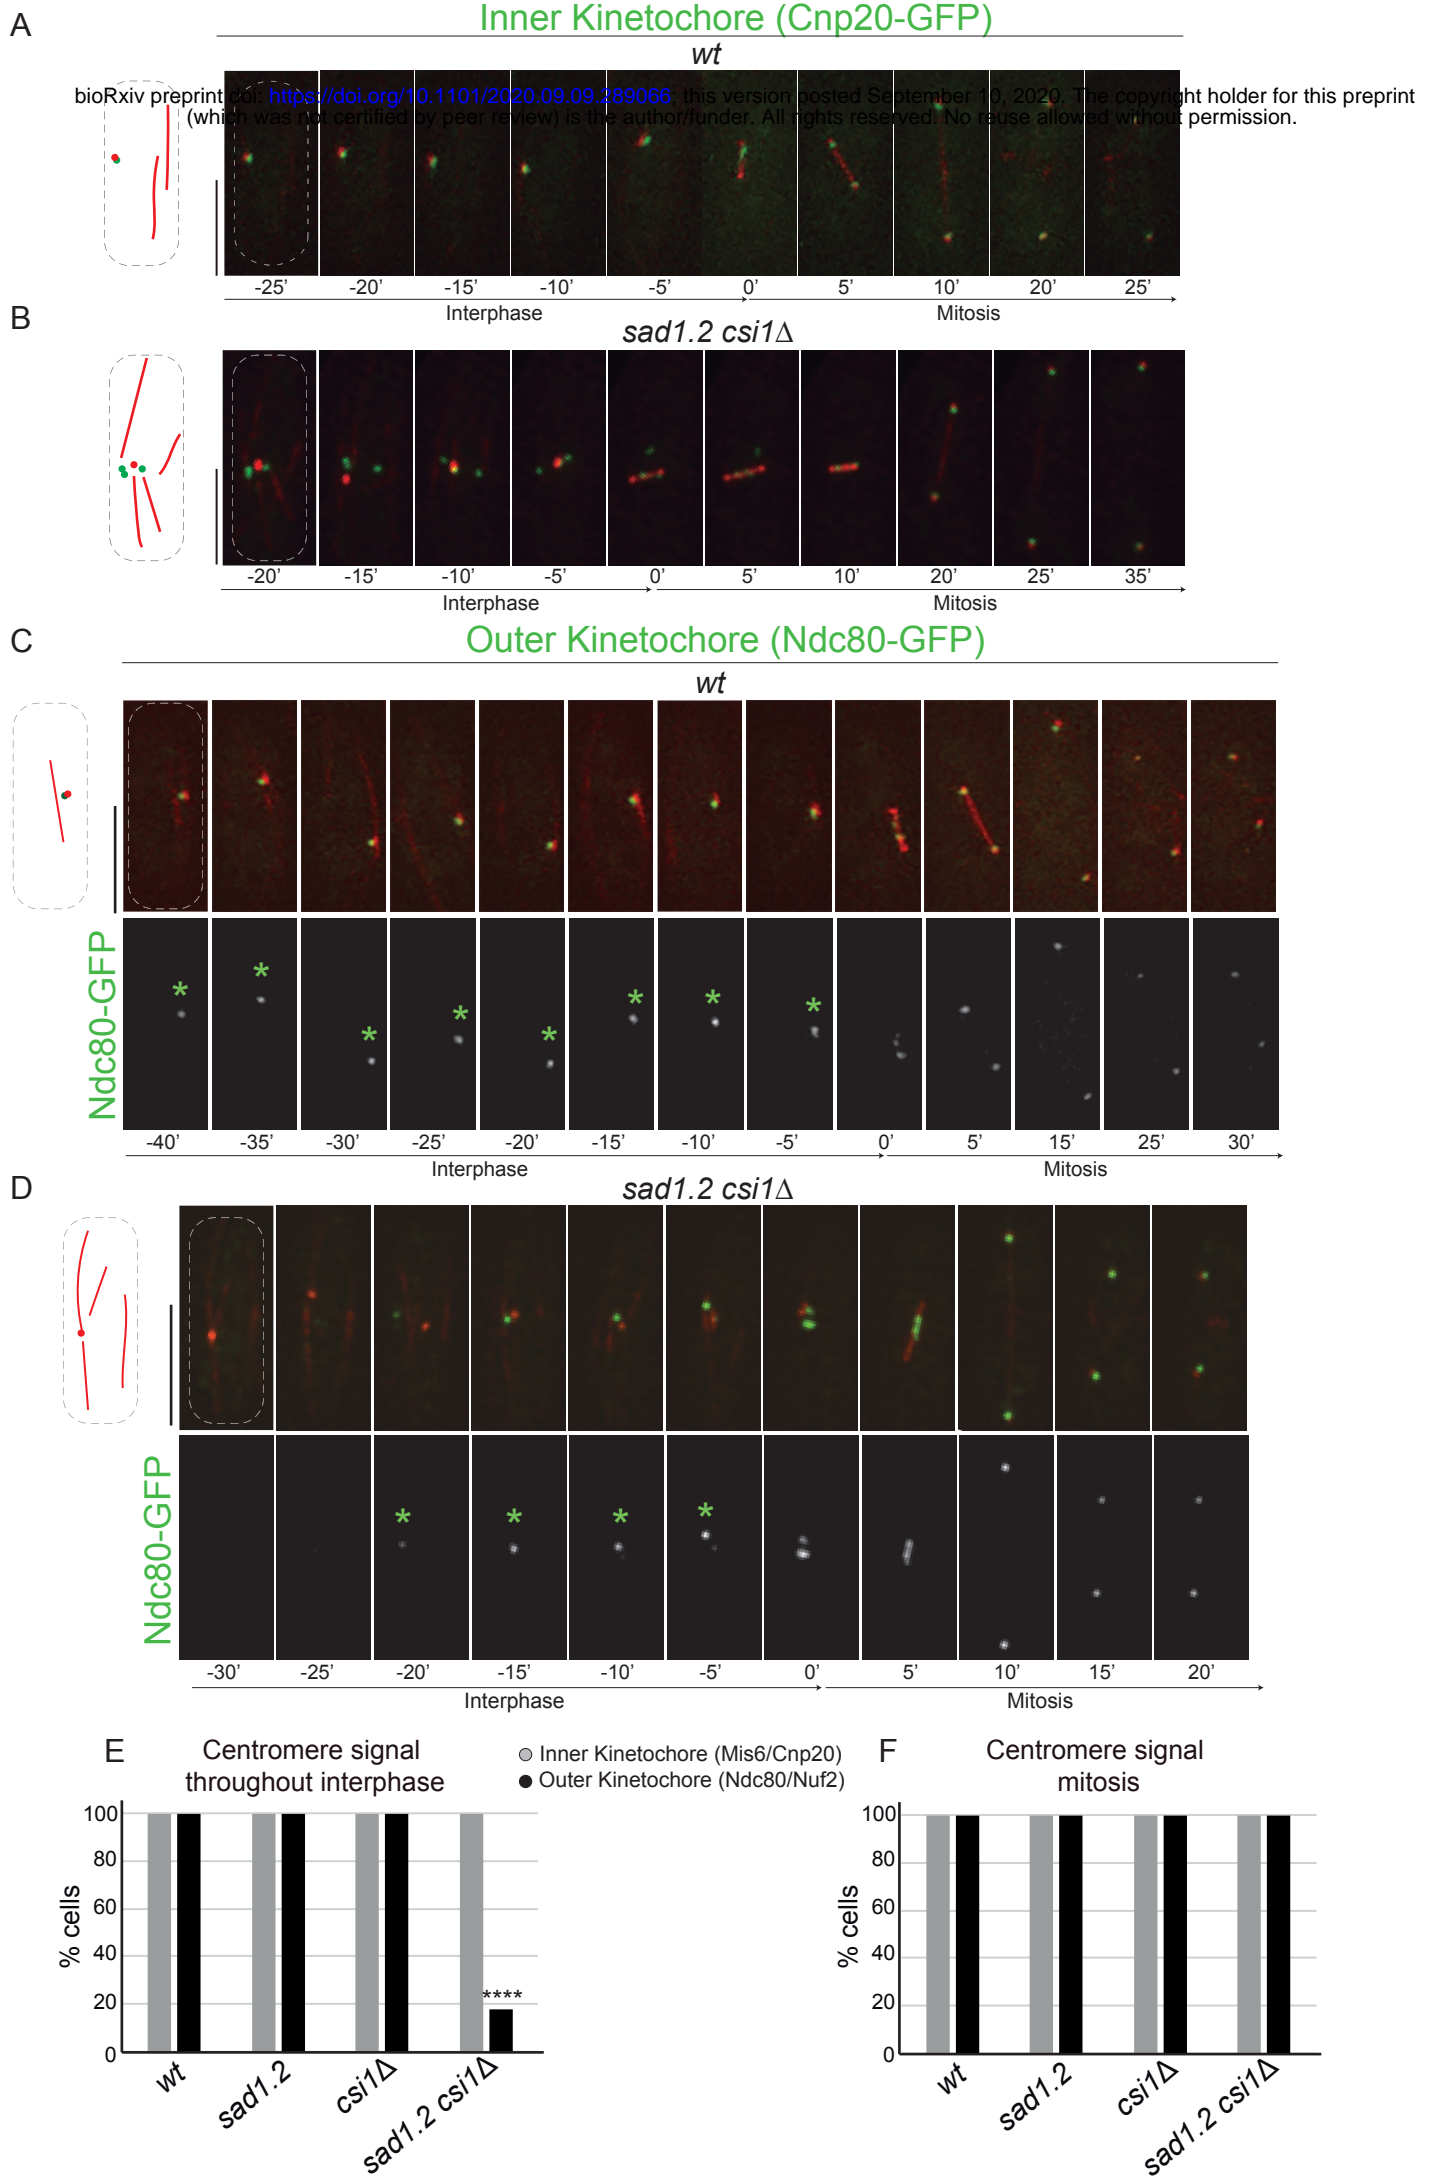

bioRxiv preprint doi: <https://doi.org/10.1101/2020.09.09.289966>; this version posted September 10, 2020. The copyright holder for this preprint (which was not certified by peer review) is the author/funder. All rights reserved. No reuse allowed without permission.

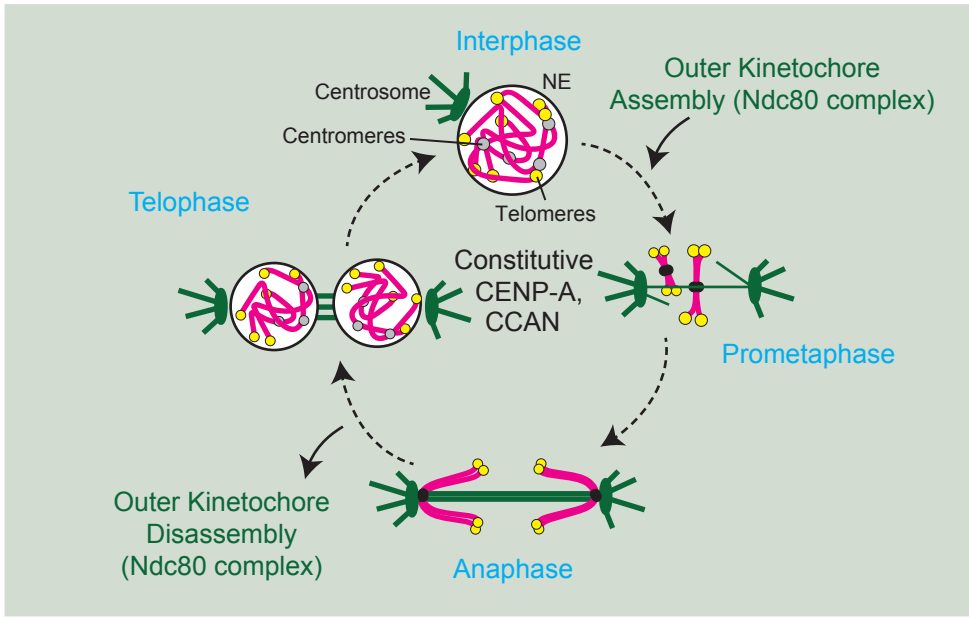

**Fission yeast**

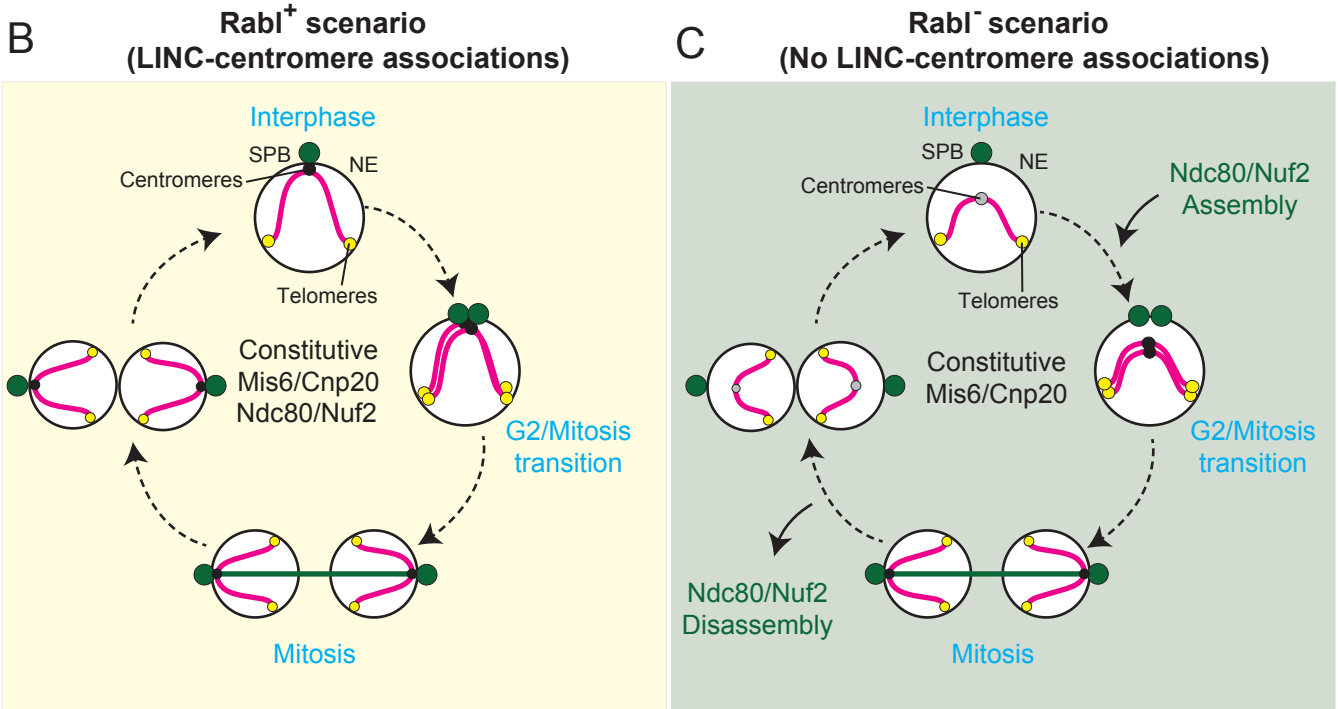

- Inner Kinetochore (Mis6/Cnp20)
- Outer Kinetochore (Ndc80/Nuf2)
